# Supplementary material for: Visualization of therapeutic intervention for acute liver injury using low-intensity pulsed ultrasound-responsive phase variant nanoparticles
Source: Royal Society of Chemistry journal article supplement (doi:10.1039/d3bm01423a), 2024-01-01
Supplement: d3bm01423a1.pdf [file d3bm01423a1.pdf]

## Supplementary Materials

# Visualization of therapeutic intervention for acute liver injury using low-intensity pulsed ultrasound-responsive phase variant nanoparticles

You Yang<sup>1†</sup>, Ju-ying Zhang<sup>1†</sup>, Zi-jun Ma<sup>1</sup>, Shi-chun Wang<sup>1</sup>, Ping He<sup>1</sup>, Xiao-qing Tang<sup>1</sup>, Chao-feng Yang<sup>3</sup>, Xia Luo<sup>1</sup>, Xing Yang<sup>1</sup>, Ling Li<sup>1</sup>, Mao-chun Zhang<sup>1</sup>, Yang Li<sup>2,3</sup>, Jin-hong Yu<sup>1,2,\*</sup>

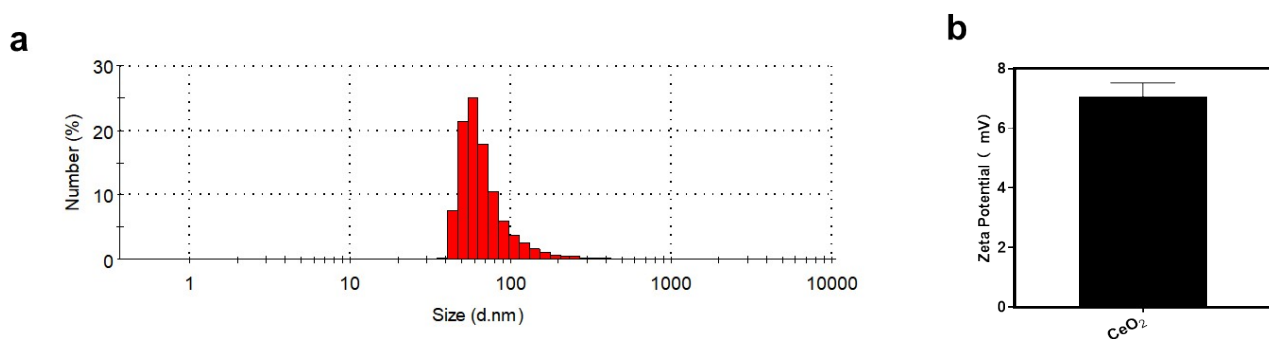

Figure S11 The size and potential of CeO<sub>2</sub>-NPs; (a) the size of the CeO<sub>2</sub>-NPs using DLS; (b) the zeta potential of the CeO<sub>2</sub>-NPs using DLS.

<sup>1</sup> Department of Ultrasound, Affiliated Hospital of North Sichuan Medical College, Innovation Centre for Science and Technology of North Sichuan Medical College, Nanchong, 637000, Sichuan, China

<sup>2</sup> Department of Ultrasound, Yuechi People's Hospital, Guangan, 638300, Sichuan, China

<sup>3</sup> Department of Radiology, Affiliated Hospital of North Sichuan Medical College, Nanchong, 637000, Sichuan, China

\* Correspondence author, E-mail: yujinhong@nsmc.edu.cn

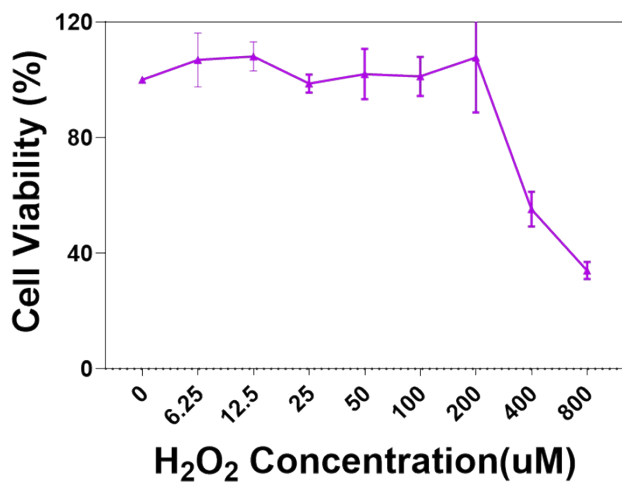

Figure SI2 Cell viabilities of AML12 cells under treatment with different concentrations of H<sub>2</sub>O<sub>2</sub>.

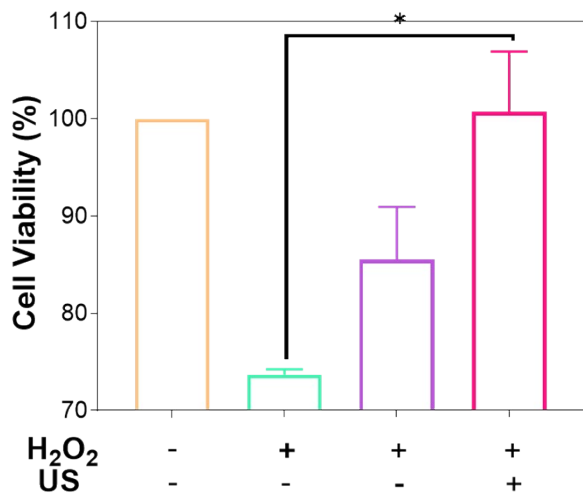

Figure SI3 Cell viabilities of AML12 cells under treatment with H<sub>2</sub>O<sub>2</sub> or H<sub>2</sub>O<sub>2</sub> plus different concentrations of PFP@CeO<sub>2</sub>@Lips.
